# Supplementary material
Source: PubMed Central journal article supplement (PMC5278719)
Supplement: AAC.01343-16_zac002175896s1.pdf [file AAC.01343-16_zac002175896s1.pdf]

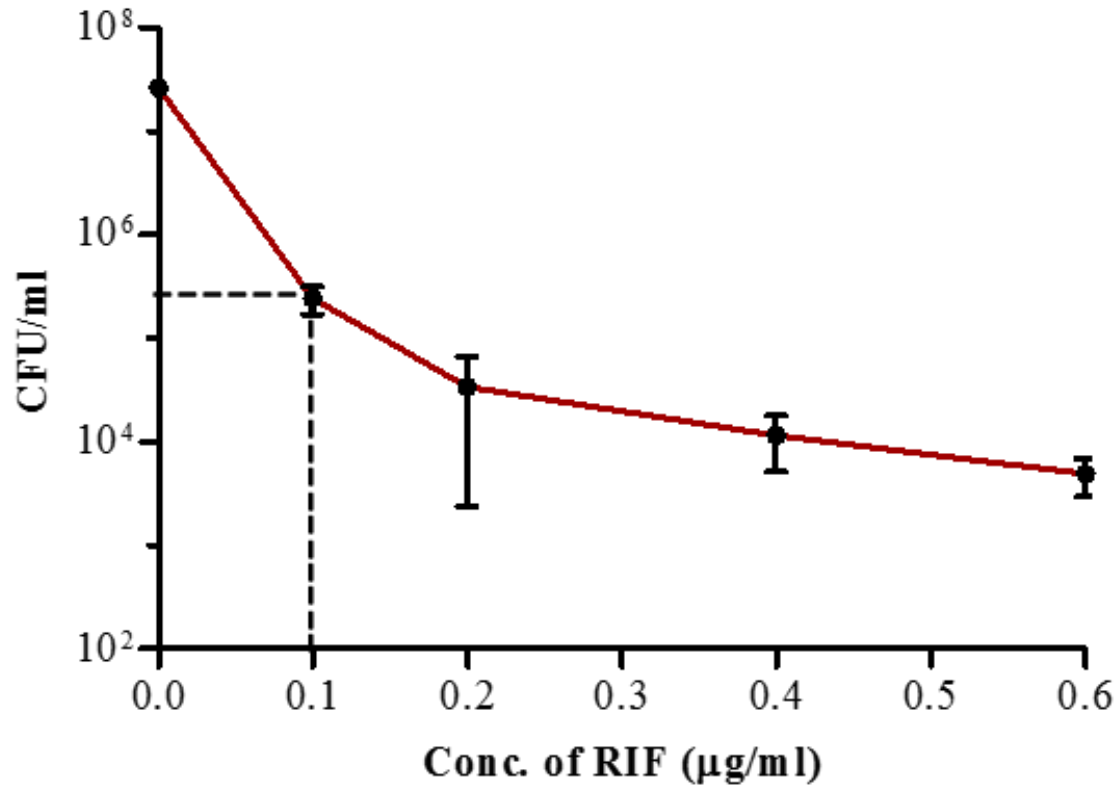

**Fig. S1.** Determination of the MBC concentration of RIF for *Mtb*. MBC was considered to be the lowest concentration of the drug that can reduce the cfu/ml by  $2\text{-log}_{10}$  or more within a period of 6 days (28). The MBC of RIF for *Mtb* was estimated to be 0.1  $\mu\text{g/ml}$  since about  $2\text{-log}_{10}$  reduction in the cfu was found to be very close to 0.1  $\mu\text{g/ml}$  of RIF.

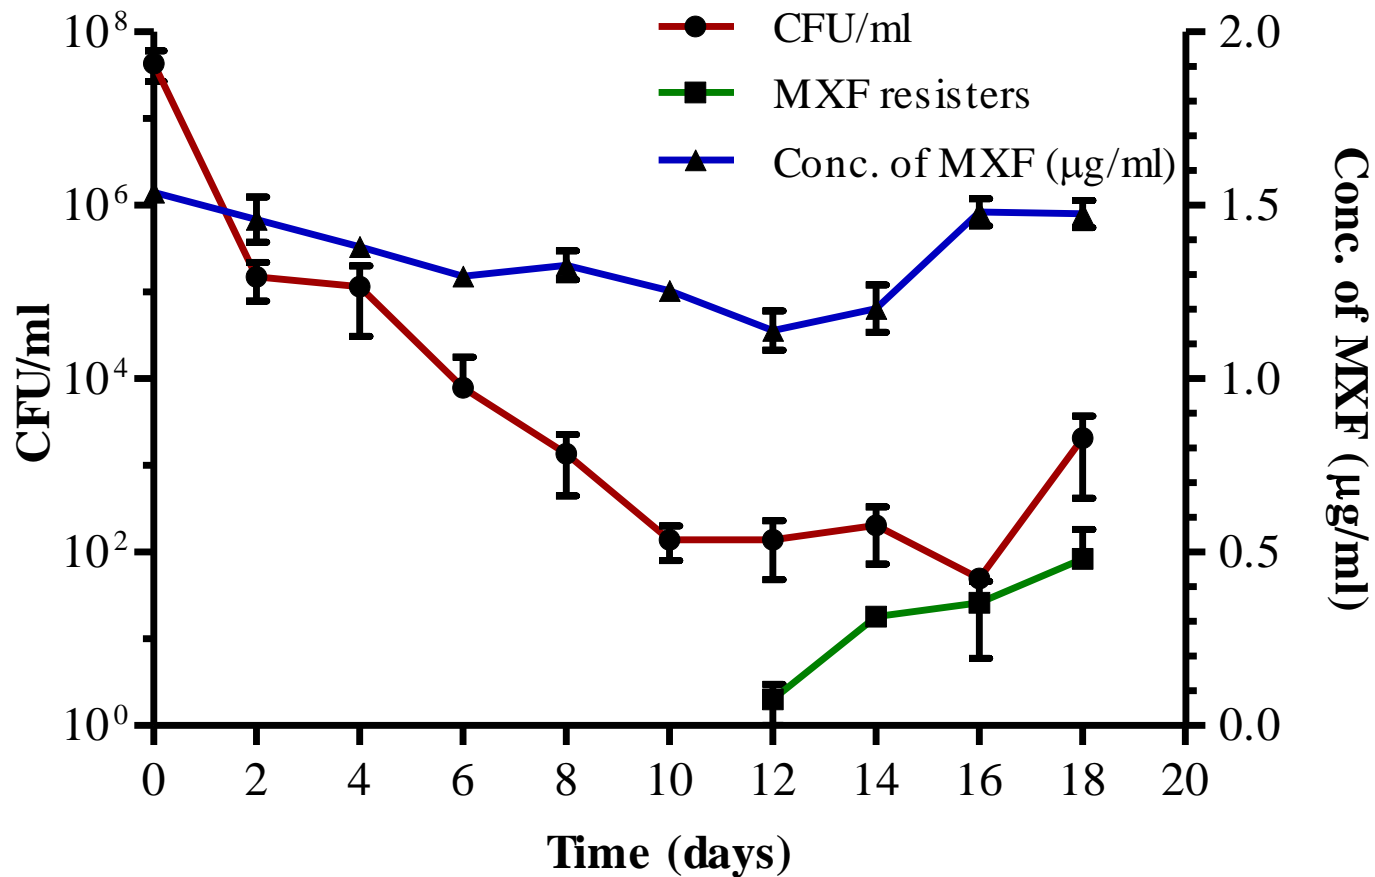

**Fig. S2.** MXF susceptibility profile of *Mtb* during 1  $\mu\text{g/ml}$  MXF treatment for 18 days showing a triphasic curve with an initial killing phase followed by a persistence phase and a phase of regrowth. MXF resistant colonies were observed from 12<sup>th</sup> day of exposure onwards. Right Y-axis represent the MXF concentration during the exposure. Although 1  $\mu\text{g/ml}$  of MXF was used, the concentration estimated was found to be not exactly 1  $\mu\text{g/ml}$  due to the sensitivity limits of *Staphylococcus aureus* bioassay for MXF.

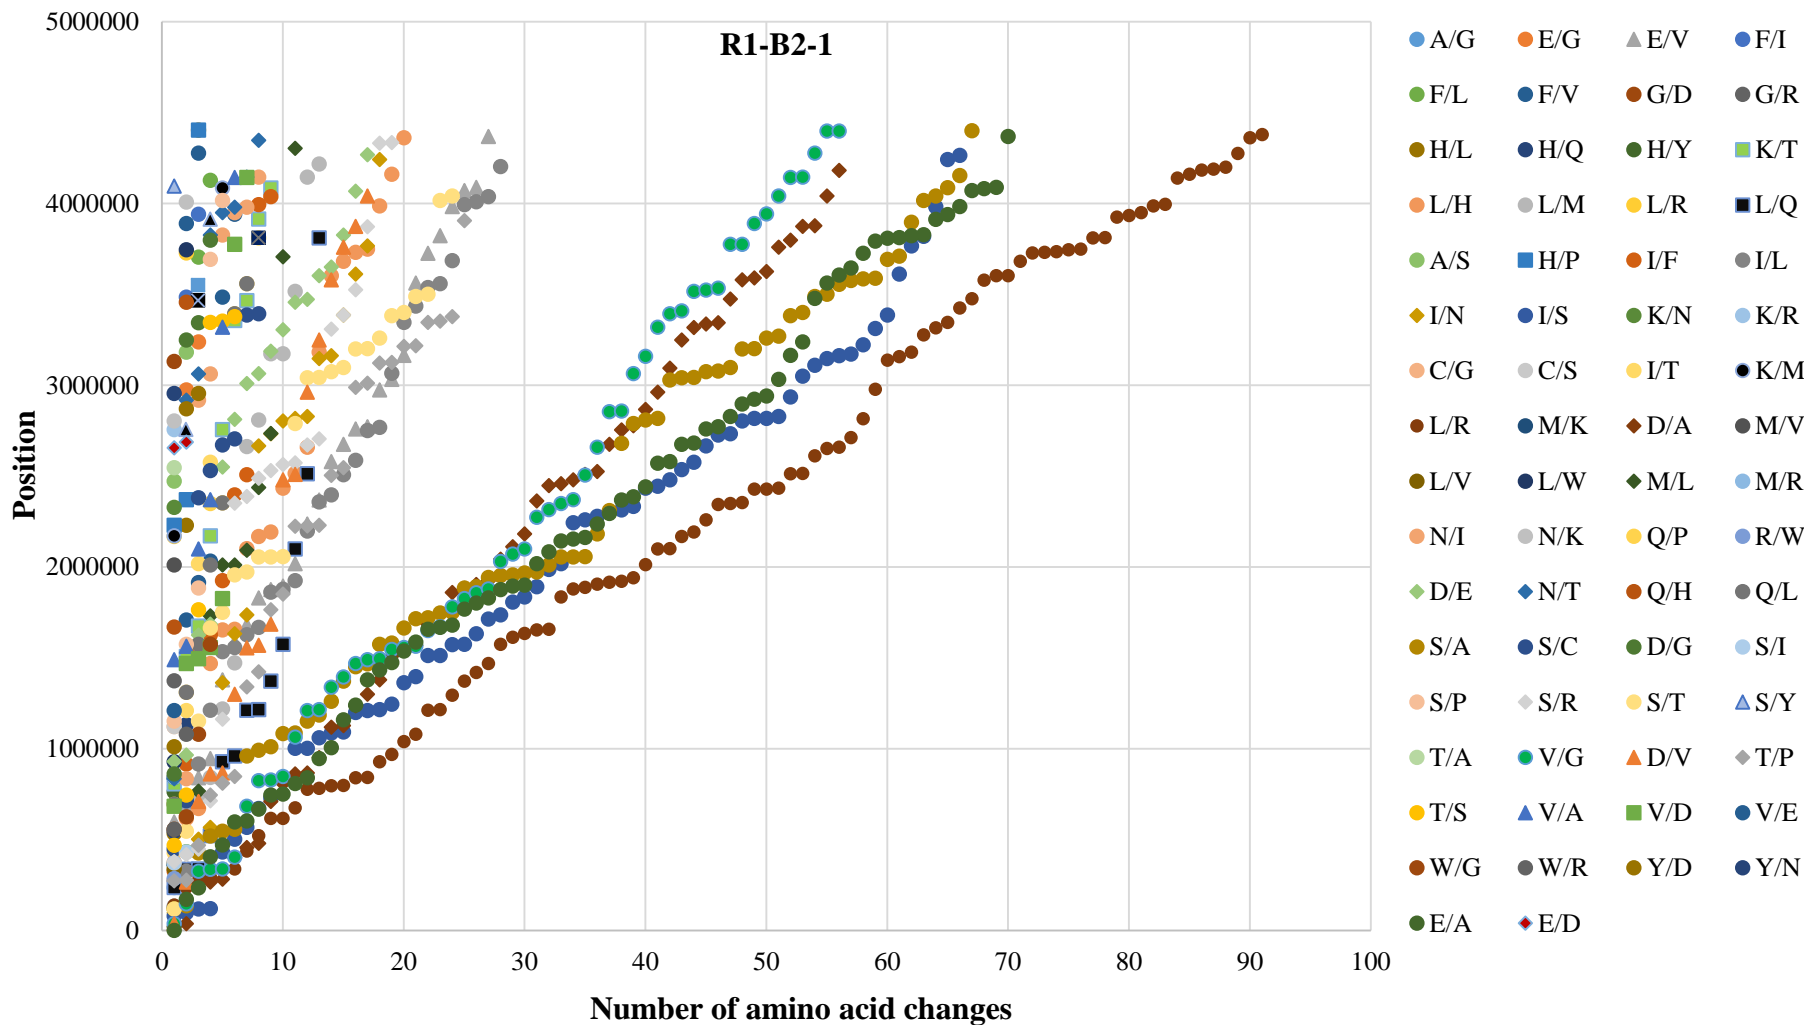

**Fig. S3.** Scatter plot representing the amino acid changes corresponding to the mutations found in the whole genome sequencing of R1-B2-1 RIF-resistant mutant. The y-axis represents the position of the mutation and the x-axis shows the number of the corresponding amino acid change.

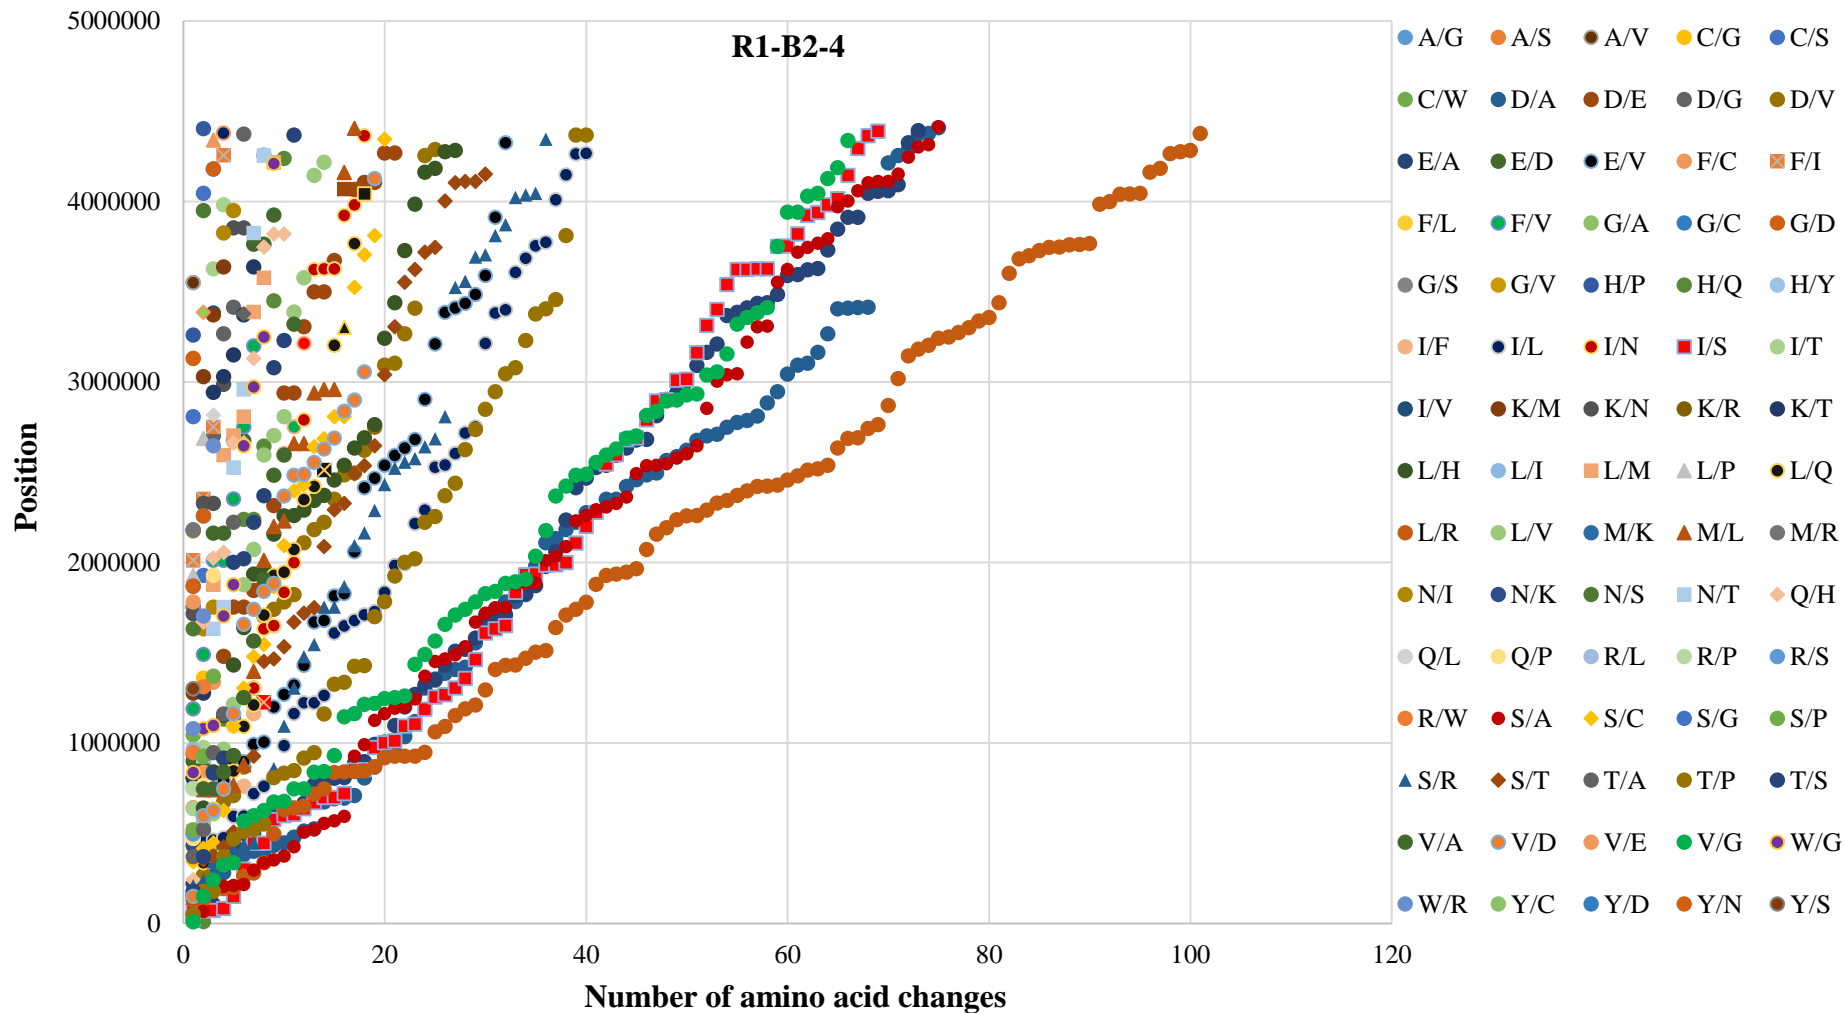

**Fig. S4.** Scatter plot representing the amino acid changes corresponding to the mutations found in the whole genome sequencing of R1-B2-4 RIF-resistant mutant. The y-axis represents the position of the mutation and the x-axis shows the number of the corresponding amino acid change.

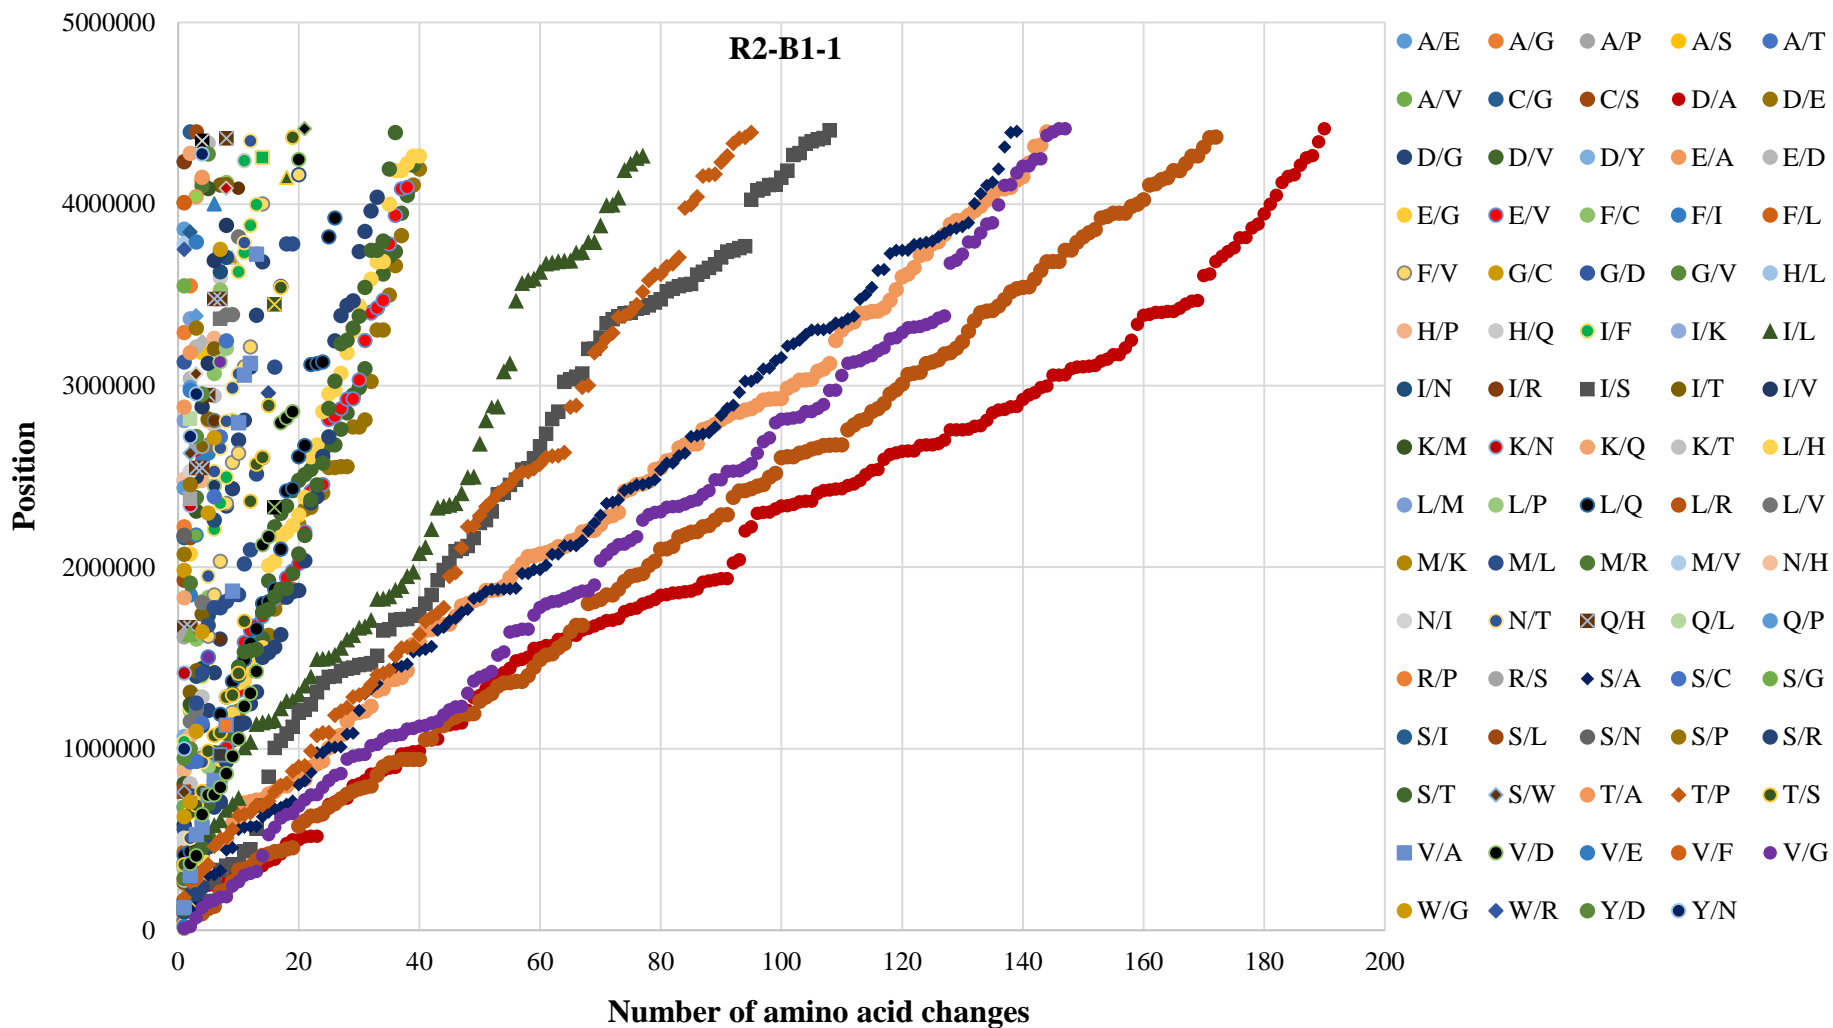

**Fig. S5.** Scatter plot representing the amino acid changes corresponding to the mutations found in the whole genome sequencing of R2-B1-1 RIF-resistant mutant. The y-axis represents the position of the mutation and the x-axis shows the number of the corresponding amino acid change.

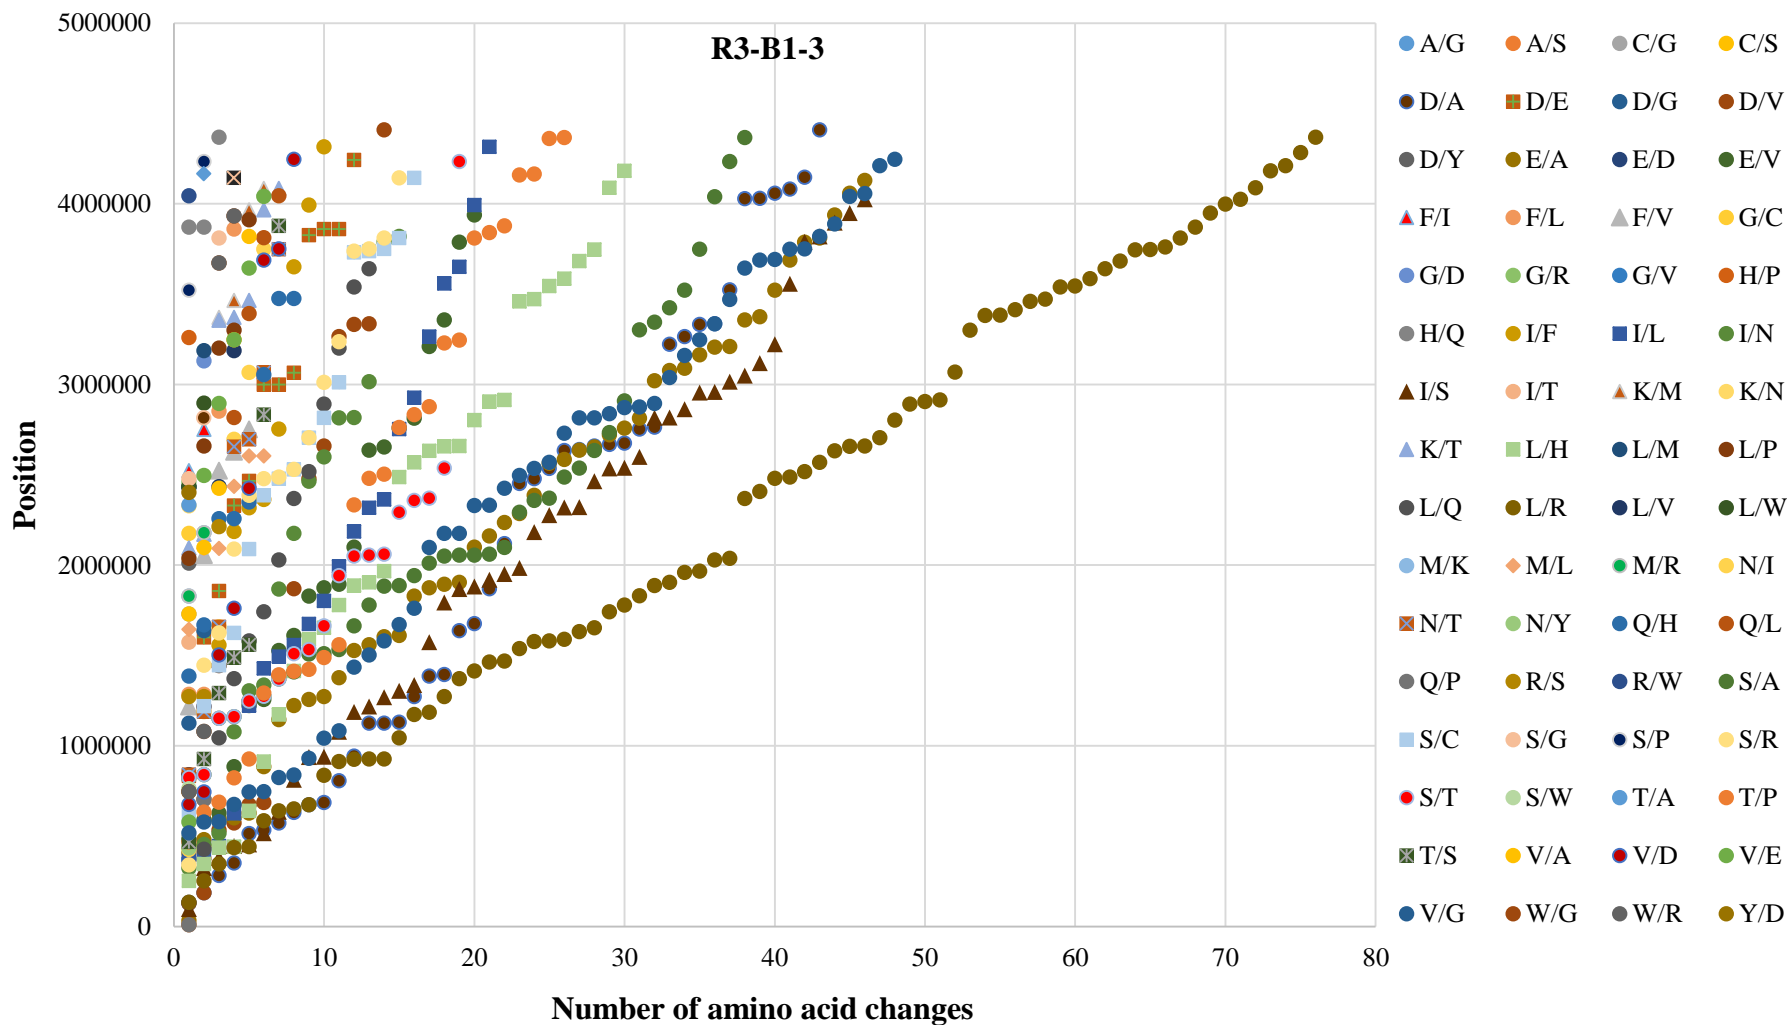

**Fig. S6.** Scatter plot representing the amino acid changes corresponding to the mutations found in the whole genome sequencing of R3-B1-3 RIF-resistant mutant. The y-axis represents the position of the mutation and the x-axis shows the number of the corresponding amino acid change.

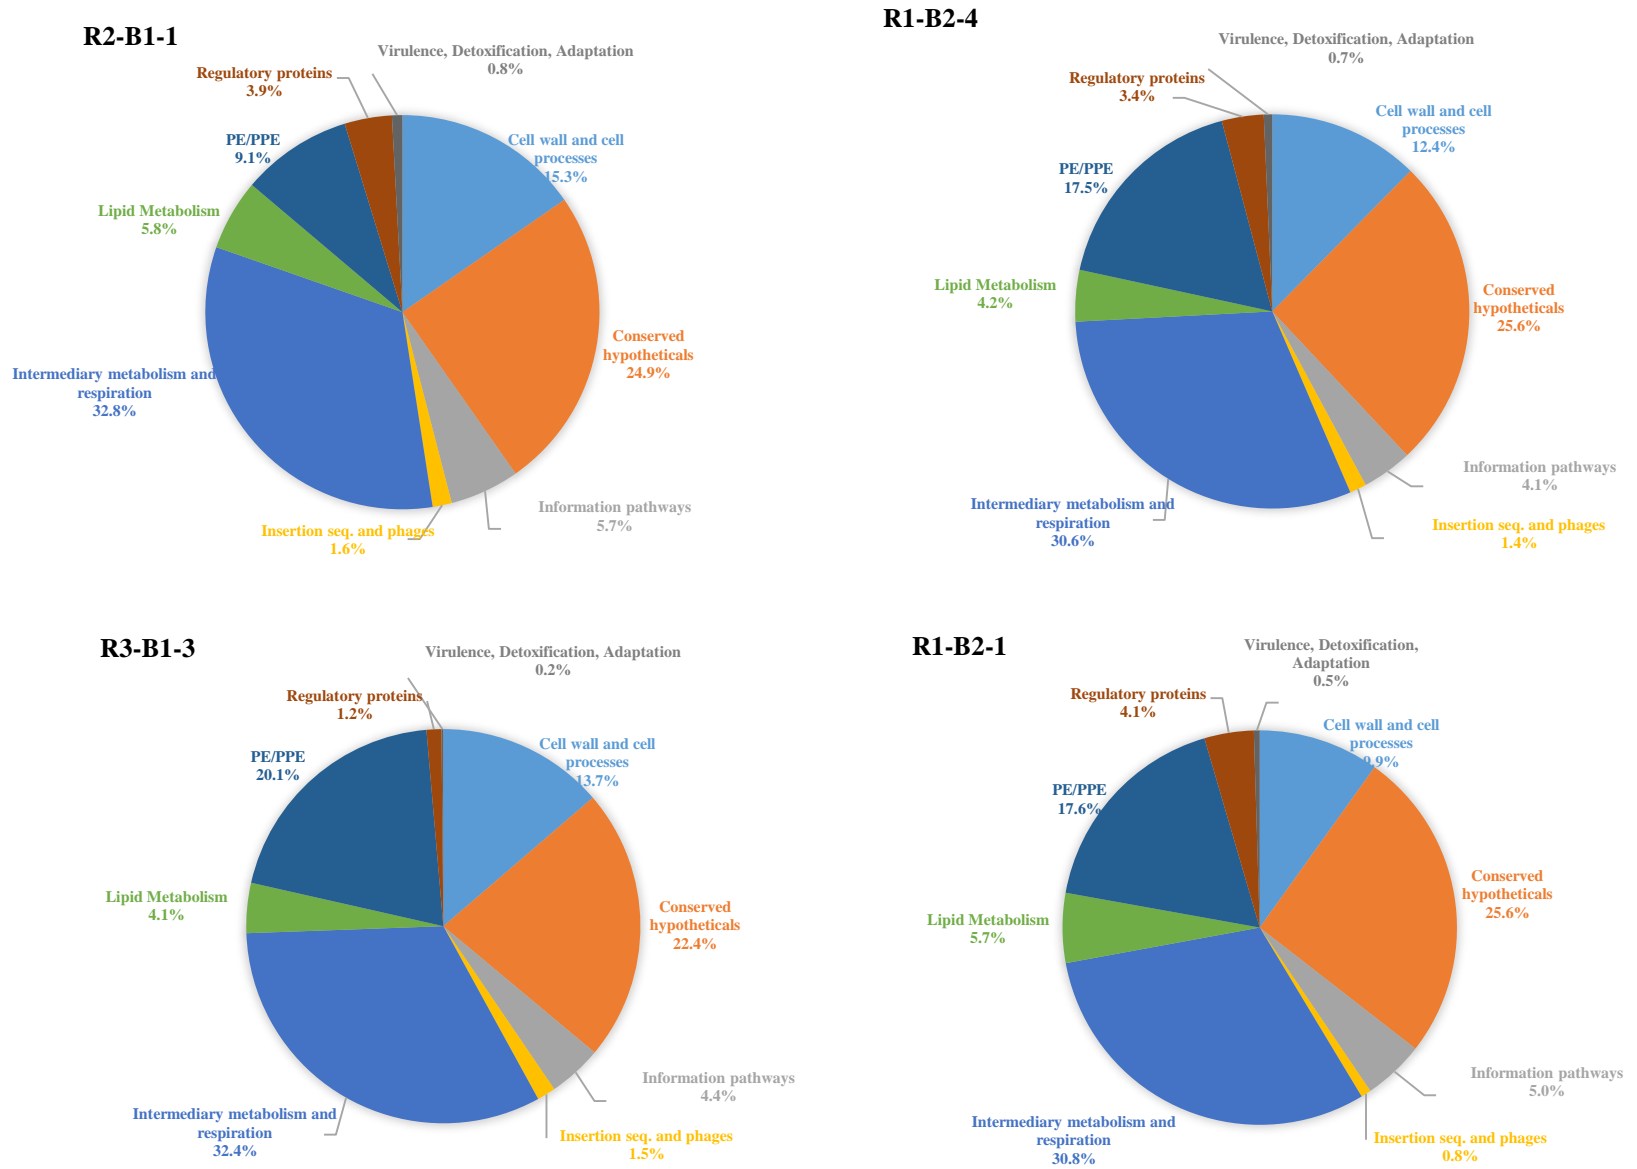

**Fig. S7.** PIE diagrams of the 4 RIF-resistant mutants showing mutations in the different category of the genes with respect to their parental strain. The genes were categorised based on their functions (source: Tuberculist).

**TABLE S1.** Bacterial strains and plasmid vectors used in the study

| Bacterial strain<br>or plasmid vector                            | Purpose                                       | References<br>(Supplementary) |
|------------------------------------------------------------------|-----------------------------------------------|-------------------------------|
| <b>Bacterial strains</b>                                         |                                               |                               |
| <i>Mycobacterium tuberculosis</i> H <sub>37</sub> R <sub>a</sub> | Experimental system                           | 1                             |
| <i>Escherichia coli</i> JM109                                    | Cloning                                       | 2                             |
| <i>Staphylococcus aureus</i> ATCC 25923                          | RIF & MXF bioassay                            | ATCC                          |
| <b>Plasmids/constructs</b>                                       |                                               |                               |
| pMV762-Mrx1-roGFP2                                               | Redox sensor vector                           | 3                             |
| pAKMN2                                                           | Genome integration vector                     | 4                             |
| pAKMN2-Mrx1-roGFP2                                               | Redox sensor vector for<br>genome integration | This study                    |
| pBS-KS                                                           | Sequencing vector                             | 5                             |
| pBS-KS-Mrx1-roGFP2                                               | Cloning vector                                | This study                    |



**TABLE S2.** Oligonucleotide primers used in the study

---

| Name of the Oligonucleotide primer | Sequence <sup>a</sup>                           |
|------------------------------------|-------------------------------------------------|
| Mrx1-rogfp2-f                      | 5' <u>ccttaatta</u> agatccggaggaatcacttc 3'     |
| Mrx1-rogfp2-r                      | 5' cc <u>atttaaatt</u> tacttgtacagctcgtccatg 3' |
| Mtu-rpoB-seg2-f                    | 5' <u>gctctag</u> aggaccagcgagcagattg 3'        |
| Mtu-rpoB-seg2-r                    | 5' <u>ggggtacc</u> gcgcgtacaccgacagc 3'         |
| Mtu-gyrA-QRDR-f                    | 5' atgacagacacgacgttgc 3'                       |
| Mtu-gyrA-QRDR-r                    | 5' tcgtagttaggatgaaatcg 3'                      |
| Mtu-gyrB-QRDR-f                    | 5' agaaggtctgtaacgaacagc 3'                     |
| Mtu-gyrB-QRDR-r                    | 5' gttgtgccaaaaacacatg 3'                       |

---

<sup>a</sup> Restriction enzyme sites are underlined.

**TABLE S3.** Proportion of *Mtb* cells with respect to mid-log phase cells during exposure to 10x MBC RIF in 3 independent cultures (R1, R2, R3)

| Time (Days)<br>(Post-exposure) | CFU/ml<br>in RIF-free plate | Proportion (%) of the cells from<br>the respective day's culture<br>post-exposure to 10x MBC RIF |
|--------------------------------|-----------------------------|--------------------------------------------------------------------------------------------------|
| <b><u>R1 Culture</u></b>       |                             |                                                                                                  |
| 0 (Mid-log phase)              | 3.00 x 10 <sup>8</sup>      | 100                                                                                              |
| 10 (Persistence phase)         | 1.00 x 10 <sup>3</sup>      | 0.00033                                                                                          |
| 11 (Persistence phase)         | 1.20 x 10 <sup>3</sup>      | 0.00040                                                                                          |
| 12 (Persistence phase)         | 2.00 x 10 <sup>3</sup>      | 0.00067                                                                                          |
| 13 (Persistence phase)         | 1.80 x 10 <sup>4</sup>      | 0.00600                                                                                          |
| 14 (Persistence phase)         | 9.80 x 10 <sup>3</sup>      | 0.00327                                                                                          |
| 15 (Persistence phase)         | 0.00                        | 0.00000                                                                                          |
| 16 (Regrowth phase)            | 0.00                        | 0.00000                                                                                          |
| 17 (Regrowth phase)            | 3.00 x 10 <sup>4</sup>      | 0.01000                                                                                          |
| 18 (Regrowth phase)            | 0.00                        | 0.00000                                                                                          |
| <b><u>R2 Culture</u></b>       |                             |                                                                                                  |
| 0 (Mid-log phase)              | 6.30 x 10 <sup>8</sup>      | 100                                                                                              |
| 10 (Persistence phase)         | 0.00                        | 0.00000                                                                                          |
| 11 (Persistence phase)         | 2.00 x 10 <sup>3</sup>      | 0.00032                                                                                          |
| 12 (Persistence phase)         | 2.00 x 10 <sup>4</sup>      | 0.00317                                                                                          |
| 13 (Persistence phase)         | 2.00 x 10 <sup>4</sup>      | 0.00317                                                                                          |
| 14 (Persistence phase)         | 3.00 x 10 <sup>4</sup>      | 0.00476                                                                                          |
| 15 (Persistence phase)         | 1.00 x 10 <sup>4</sup>      | 0.00159                                                                                          |
| 16 (Regrowth phase)            | 2.10 x 10 <sup>5</sup>      | 0.03333                                                                                          |
| 17 (Regrowth phase)            | 2.80 x 10 <sup>5</sup>      | 0.04444                                                                                          |
| 18 (Regrowth phase)            | 8.90 x 10 <sup>5</sup>      | 0.14127                                                                                          |
| <b><u>R3 Culture</u></b>       |                             |                                                                                                  |
| 0 (MLP)                        | 6.00 x 10 <sup>8</sup>      | 100                                                                                              |
| 10 (Persistence)               | 8.50 x 10 <sup>3</sup>      | 0.00142                                                                                          |
| 11 (Persistence phase)         | 1.00 x 10 <sup>4</sup>      | 0.00167                                                                                          |
| 12 (Persistence phase)         | 1.00 x 10 <sup>3</sup>      | 0.00017                                                                                          |
| 13 (Persistence phase)         | 1.00 x 10 <sup>4</sup>      | 0.00167                                                                                          |
| 14 (Persistence phase)         | 4.00 x 10 <sup>3</sup>      | 0.00067                                                                                          |
| 15 (Persistence phase)         | 0.00                        | 0.00000                                                                                          |
| 16 (Regrowth phase)            | 0.00                        | 0.00000                                                                                          |
| 17 (Regrowth phase)            | 1.00 x 10 <sup>4</sup>      | 0.00167                                                                                          |
| 18 (Regrowth phase)            | 0.00                        | 0.00000                                                                                          |

Proportion (%) of the cfu/ml is given with respect to the mid-log phase cfu/ml (day 0) of *Mtb* cells of each culture (n = 3). Multiple time points of the persistence phase cultures are given, showing minimal variation in the cfu/ml. The cfu/ml of the killing phase (day 1 to day 9) is not given. The zero values of cfu/ml indicate the absence of any colony in spite of plating aliquots of undiluted culture.

**TABLE S4.** Proportion of *Mtb* cells with respect to mid-log phase cells during exposure to 20x MBC RIF in 3 independent cultures (R1, R2, R3)

| Time (Days)<br>Post-exposure | CFU/ml<br>in RIF-free plate | Proportion (%) of the cells from<br>the respective day's culture<br>post-exposure to 20x MBC RIF |
|------------------------------|-----------------------------|--------------------------------------------------------------------------------------------------|
| <b><u>R1 Culture</u></b>     |                             |                                                                                                  |
| 0 (Mid-log phase)            | 4.69 x 10 <sup>8</sup>      | 100                                                                                              |
| 12 (Persistence phase)       | 3.80 x 10 <sup>4</sup>      | 0.00810                                                                                          |
| 14 (Persistence phase)       | 3.10 x 10 <sup>4</sup>      | 0.00661                                                                                          |
| 16 (Persistence phase)       | 0.00                        | 0.00000                                                                                          |
| 18 (Regrowth phase)          | 2.00 x 10 <sup>5</sup>      | 0.04264                                                                                          |
| 20 (Regrowth phase)          | 4.00 x 10 <sup>5</sup>      | 0.08529                                                                                          |
| <b><u>R2 Culture</u></b>     |                             |                                                                                                  |
| 0 (Mid-log phase)            | 6.14 x 10 <sup>8</sup>      | 100                                                                                              |
| 12 (Persistence phase)       | 5.80 x 10 <sup>3</sup>      | 0.00094                                                                                          |
| 14 (Persistence phase)       | 4.40 x 10 <sup>3</sup>      | 0.00072                                                                                          |
| 16 (Persistence phase)       | 1.30 x 10 <sup>4</sup>      | 0.00212                                                                                          |
| 18 (Regrowth phase)          | 1.10 x 10 <sup>5</sup>      | 0.01792                                                                                          |
| 20 (Regrowth phase)          | 0.00                        | 0.00000                                                                                          |
| <b><u>R3 Culture</u></b>     |                             |                                                                                                  |
| 0 (Mid-log phase)            | 5.72 x 10 <sup>8</sup>      | 100                                                                                              |
| 12 (Persistence phase)       | 6.00 x 10 <sup>3</sup>      | 0.00105                                                                                          |
| 14 (Persistence phase)       | 8.60 x 10 <sup>3</sup>      | 0.00150                                                                                          |
| 16 (Persistence phase)       | 7.20 x 10 <sup>3</sup>      | 0.00126                                                                                          |
| 18 (Regrowth phase)          | 4.00 x 10 <sup>3</sup>      | 0.00070                                                                                          |
| 20 (Regrowth phase)          | 0.00                        | 0.00000                                                                                          |

Proportion (%) of the cfu/ml is given with respect to the mid-log phase cfu/ml (day 0) of *Mtb* cells of each culture (n = 3). Multiple time points of the persistence phase cultures are given, showing minimal variation in the cfu/ml. The cfu/ml of the killing phase (day 1 to day 11) is not given. The zero values of cfu/ml indicate the absence of any colony in spite of plating aliquots of undiluted culture.

**TABLE S5.** Proportion of RIF-resistant mutants of *Mtb* cells that emerged during exposure to 10x MBC RIF in the 3 independent cultures (R1, R2, R3) and selected on 50x MBC RIF plates.

| Time (Days)<br>(Post-exposure) | CFU/ml<br>(RIF-free plate) | CFU/ml<br>(RIF-plus plate) | Proportion (%) of the<br>RIF-resistant mutants |
|--------------------------------|----------------------------|----------------------------|------------------------------------------------|
| <b><u>R1 Culture</u></b>       |                            |                            |                                                |
| 0 (Mid-log phase)              | 3.00 x 10 <sup>8</sup>     | 0.00                       | 00.00                                          |
| 10 (Persistence phase)         | 1.00 x 10 <sup>3</sup>     | 4.00 x 10 <sup>1</sup>     | 04.00                                          |
| 11 (Persistence phase)         | 1.20 x 10 <sup>3</sup>     | 0.00                       | 00.00                                          |
| 12 (Persistence phase)         | 2.00 x 10 <sup>3</sup>     | 2.10 x 10 <sup>2</sup>     | 10.50                                          |
| 13 (Persistence phase)         | 1.80 x 10 <sup>4</sup>     | 6.10 x 10 <sup>2</sup>     | 03.39                                          |
| 14 (Persistence phase)         | 9.80 x 10 <sup>3</sup>     | 2.69 x 10 <sup>3</sup>     | 27.45                                          |
| 15 (Persistence phase)         | 0.00                       | 0.00                       | 00.00                                          |
| 16 (Regrowth phase)            | 0.00                       | 1.60 x 10 <sup>3</sup>     | UND                                            |
| 17 (Regrowth phase)            | 3.00 x 10 <sup>4</sup>     | 2.30 x 10 <sup>3</sup>     | 07.67                                          |
| 18 (Regrowth phase)            | 0.00                       | 2.10 x 10 <sup>3</sup>     | UND                                            |
| <b><u>R2 Culture</u></b>       |                            |                            |                                                |
| 0 (Mid-log phase)              | 6.30 x 10 <sup>8</sup>     | 0.00                       | 00.00                                          |
| 10 (Persistence phase)         | 0.00                       | 0.00                       | 00.00                                          |
| 11 (Persistence phase)         | 2.00 x 10 <sup>3</sup>     | 0.00                       | 00.00                                          |
| 12 (Persistence phase)         | 2.00 x 10 <sup>4</sup>     | 4.20 x 10 <sup>2</sup>     | 02.10                                          |
| 13 (Persistence phase)         | 2.00 x 10 <sup>4</sup>     | 3.00 x 10 <sup>2</sup>     | 01.50                                          |
| 14 (Persistence phase)         | 3.00 x 10 <sup>4</sup>     | 4.74 x 10 <sup>3</sup>     | 15.80                                          |
| 15 (Persistence phase)         | 1.00 x 10 <sup>4</sup>     | 0.00                       | 00.00                                          |
| 16 (Regrowth phase)            | 2.10 x 10 <sup>5</sup>     | 1.42 x 10 <sup>3</sup>     | 00.68                                          |
| 17 (Regrowth phase)            | 2.80 x 10 <sup>5</sup>     | 0.00                       | 00.00                                          |
| 18 (Regrowth phase)            | 8.90 x 10 <sup>5</sup>     | 1.50 x 10 <sup>3</sup>     | 01.69                                          |
| <b><u>R3 Culture</u></b>       |                            |                            |                                                |
| 0 (Mid-log phase)              | 6.00 x 10 <sup>8</sup>     | 0.00                       | 00.00                                          |
| 10 (Persistence phase)         | 8.50 x 10 <sup>3</sup>     | 0.00                       | 00.00                                          |
| 11 (Persistence phase)         | 1.00 x 10 <sup>4</sup>     | 0.00                       | 00.00                                          |
| 12 (Persistence phase)         | 1.00 x 10 <sup>3</sup>     | 0.00                       | 00.00                                          |
| 13 (Persistence phase)         | 1.00 x 10 <sup>4</sup>     | 2.50 x 10 <sup>2</sup>     | 02.50                                          |
| 14 (Persistence phase)         | 4.00 x 10 <sup>3</sup>     | 1.57 x 10 <sup>3</sup>     | 39.25                                          |
| 15 (Persistence phase)         | 0.00                       | 6.40 x 10 <sup>2</sup>     | UND                                            |
| 16 (Regrowth phase)            | 0.00                       | 1.80 x 10 <sup>3</sup>     | UND                                            |
| 17 (Regrowth phase)            | 1.00 x 10 <sup>4</sup>     | 1.21 x 10 <sup>3</sup>     | 12.10                                          |
| 18 (Regrowth phase)            | 0.00                       | 2.32 x 10 <sup>3</sup>     | UND                                            |

Proportion of the RIF-resistant mutants (from RIF-plus plate) is given with respect to the cfu/ml (from RIF-free plate) of the same day's culture post-exposure to RIF. Different proportions of RIF-resistant mutants could be seen in different day's culture. Colonies could be observed only after 6-7 weeks post-plating, but fresh colonies kept on coming even after 8-10 weeks. The cfu/ml of the killing phase (day 1 to day 9) is not given. The zero values of cfu/ml indicate the absence of any colony in spite of plating aliquots of undiluted culture. UND, undefined since 0 is in the denominator.

**TABLE S6.** Proportion of *Mtb* cells with respect to mid-log phase cells during exposure to 2x MBC MXF in 3 independent cultures (M1, M2, M3)

| Time (Days)<br>(Post-exposure) | CFU/ml<br>in MXF-free plate | Proportion (%) of the cells on the<br>respective days post-exposure |
|--------------------------------|-----------------------------|---------------------------------------------------------------------|
| <b><u>M1 Culture</u></b>       |                             |                                                                     |
| 0 (MLP)                        | $3.47 \times 10^7$          | 100                                                                 |
| 10 (Persistence phase)         | $2.00 \times 10^2$          | 0.00058                                                             |
| 11 (Persistence phase)         | $1.66 \times 10^3$          | 0.00478                                                             |
| 12 (Persistence phase)         | $2.40 \times 10^2$          | 0.00069                                                             |
| 13 (Persistence phase)         | $6.00 \times 10^1$          | 0.00017                                                             |
| 14 (Persistence phase)         | $3.40 \times 10^2$          | 0.00098                                                             |
| 15 (Persistence phase)         | $6.00 \times 10^2$          | 0.00173                                                             |
| 16 (Persistence phase)         | $5.00 \times 10^1$          | 0.00014                                                             |
| 17 (Regrowth phase)            | $1.50 \times 10^3$          | 0.00432                                                             |
| 18 (Regrowth phase)            | $3.21 \times 10^3$          | 0.00925                                                             |
| <b><u>M2 Culture</u></b>       |                             |                                                                     |
| 0 (MLP)                        | $6.30 \times 10^7$          | 100                                                                 |
| 10 (Persistence phase)         | $1.40 \times 10^2$          | 0.00022                                                             |
| 11 (Persistence phase)         | $7.60 \times 10^2$          | 0.00121                                                             |
| 12 (Persistence phase)         | $1.20 \times 10^2$          | 0.00019                                                             |
| 13 (Persistence phase)         | $4.00 \times 10^1$          | 0.00006                                                             |
| 14 (Persistence phase)         | $8.00 \times 10^1$          | 0.00013                                                             |
| 15 (Persistence phase)         | $1.00 \times 10^2$          | 0.00016                                                             |
| 16 (Persistence phase)         | 0.00                        | 0.00000                                                             |
| 17 (Regrowth phase)            | $1.00 \times 10^2$          | 0.00016                                                             |
| 18 (Regrowth phase)            | $1.79 \times 10^2$          | 0.00028                                                             |
| <b><u>M3 Culture</u></b>       |                             |                                                                     |
| 0 (MLP)                        | $3.30 \times 10^7$          | 100                                                                 |
| 10 (Persistence phase)         | $8.00 \times 10^1$          | 0.00035                                                             |
| 11 (Persistence phase)         | $5.00 \times 10^1$          | 0.00205                                                             |
| 12 (Persistence phase)         | $6.00 \times 10^1$          | 0.00035                                                             |
| 13 (Persistence phase)         | $1.00 \times 10^1$          | 0.00009                                                             |
| 14 (Persistence phase)         | $1.90 \times 10^2$          | 0.00056                                                             |
| 15 (Persistence phase)         | $3.10 \times 10^2$          | 0.00094                                                             |
| 16 (Persistence phase)         | 0.00                        | 0.00000                                                             |
| 17 (Regrowth phase)            | $2.10 \times 10^3$          | 0.00636                                                             |
| 18 (Regrowth phase)            | $2.81 \times 10^3$          | 0.00852                                                             |

Proportion (%) of the cfu/ml is given with respect to the mid-log phase cfu/ml (day 0) of *Mtb* cells of each culture (n = 3). Multiple time points of the persistence phase are given, showing minimal variation in the cfu/ml. The cfu/ml of the killing phase (day 1 to day 9) is not given. The zero values of cfu/ml indicate the absence of any colony in spite of plating aliquots of undiluted culture.

**TABLE S7.** Proportion of MXF-resistant mutants of *Mtb* cells that emerged during exposure to 2x MBC MXF in the 3 independent cultures (M1, M2, M3) and selected on 4x MBC MXF plates.

| Time (Days)<br>(Post-exposure) | CFU/ml<br>(MXF-free plate) | CFU/ml<br>(MXF-plus plate) | Proportion (%) of the<br>MXF-resistant mutants |
|--------------------------------|----------------------------|----------------------------|------------------------------------------------|
| <b><u>M1 Culture</u></b>       |                            |                            |                                                |
| 0 (MLP)                        | 3.47 x 10 <sup>7</sup>     | 0.00                       | 00.00                                          |
| 10 (Persistence phase)         | 2.00 x 10 <sup>2</sup>     | 0.00                       | 00.00                                          |
| 11 (Persistence phase)         | 1.66 x 10 <sup>3</sup>     | 0.00                       | 00.00                                          |
| 12 (Persistence phase)         | 2.40 x 10 <sup>2</sup>     | 1.00 x 10 <sup>1</sup>     | 04.17                                          |
| 13 (Persistence phase)         | 6.00 x 10 <sup>1</sup>     | 0.00                       | 00.00                                          |
| 14 (Persistence phase)         | 3.40 x 10 <sup>2</sup>     | 0.00                       | 00.00                                          |
| 15 (Persistence phase)         | 6.00 x 10 <sup>2</sup>     | 1.20 x 10 <sup>2</sup>     | 20.00                                          |
| 16 (Persistence phase)         | 5.00 x 10 <sup>1</sup>     | 3.00 x 10 <sup>1</sup>     | 60.00                                          |
| 17 (Regrowth phase)            | 1.50 x 10 <sup>3</sup>     | 2.20 x 10 <sup>2</sup>     | 14.67                                          |
| 18 (Regrowth phase)            | 3.21 x 10 <sup>3</sup>     | 4.70 x 10 <sup>2</sup>     | 14.64                                          |
| <b><u>M2 Culture</u></b>       |                            |                            |                                                |
| 0 (MLP)                        | 6.30 x 10 <sup>7</sup>     | 0.00                       | 00.00                                          |
| 10 (Persistence phase)         | 1.40 x 10 <sup>2</sup>     | 0.00                       | 00.00                                          |
| 11 (Persistence phase)         | 7.60 x 10 <sup>2</sup>     | 0.00                       | 00.00                                          |
| 12 (Persistence phase)         | 1.20 x 10 <sup>2</sup>     | 0.00                       | 00.00                                          |
| 13 (Persistence phase)         | 4.00 x 10 <sup>1</sup>     | 0.00                       | 00.00                                          |
| 14 (Persistence phase)         | 8.00 x 10 <sup>1</sup>     | 0.00                       | 00.00                                          |
| 15 (Persistence phase)         | 1.00 x 10 <sup>2</sup>     | 1.00 x 10 <sup>1</sup>     | 10.00                                          |
| 16 (Persistence phase)         | 0.00                       | 4.00 x 10 <sup>1</sup>     | UND                                            |
| 17 (Regrowth phase)            | 1.00 x 10 <sup>2</sup>     | 0.00                       | 00.00                                          |
| 18 (Regrowth phase)            | 1.79 x 10 <sup>2</sup>     | 7.00 x 10 <sup>1</sup>     | 39.10                                          |
| <b><u>M3 Culture</u></b>       |                            |                            |                                                |
| 0 (MLP)                        | 3.30 x 10 <sup>7</sup>     | 0.00                       | 00.00                                          |
| 10 (Persistence phase)         | 8.00 x 10 <sup>1</sup>     | 0.00                       | 00.00                                          |
| 11 (Persistence phase)         | 5.00 x 10 <sup>1</sup>     | 0.00                       | 00.00                                          |
| 12 (Persistence phase)         | 6.00 x 10 <sup>1</sup>     | 3.00 x 10 <sup>1</sup>     | 50.00                                          |
| 13 (Persistence phase)         | 1.00 x 10 <sup>1</sup>     | 2.00 x 10 <sup>1</sup>     | 200.0                                          |
| 14 (Persistence phase)         | 1.90 x 10 <sup>2</sup>     | 1.80 x 10 <sup>2</sup>     | 94.74                                          |
| 15 (Persistence phase)         | 3.10 x 10 <sup>2</sup>     | 2.50 x 10 <sup>2</sup>     | 80.65*                                         |
|                                |                            | 4.50 x 10 <sup>2</sup>     | 145.16*                                        |
| 16 (Persistence phase)         | 0.00                       | 4.40 x 10 <sup>2</sup>     | UND                                            |
| 17 (Regrowth phase)            | 2.10 x 10 <sup>3</sup>     | 1.12 x 10 <sup>3</sup>     | 53.33                                          |
| 18 (Regrowth phase)            | 2.81 x 10 <sup>3</sup>     | 1.97 x 10 <sup>3</sup>     | 70.11                                          |

Different proportions of MXF-resistant mutants could be seen in different day's culture. Colonies could be observed only after about 3 months post-plating, but fresh colonies kept coming up even after 3 months. \*For example, in M3-15 culture, 2.5 x 10<sup>2</sup> was the cfu after 3 months post-plating and 4.5 x 10<sup>2</sup> after 4 months because more number of colonies had emerged on the same plates. This was the case where the proportions were unusually high. The cfu/ml of the killing phase (day 1 to day 9) is not given. The zero values of cfu/ml indicate the absence of any colony in spite of plating aliquots of undiluted culture. UND, undefined since 0 is in the denominator.

**TABLE S8.** List of *gyrA* mutations at the QRDR<sup>a</sup> of MXF-resistant mutants of *Mtb* cells isolated from the RIF persistence phase cells and plated on 4x MBC MXF plates in the Luria-Delbruck experiment

| Clone Name <sup>b</sup> | Mutation Codon | Nucleotide Position | AA <sup>c</sup> Change | AA <sup>c</sup> Position | Nucleotide Change |
|-------------------------|----------------|---------------------|------------------------|--------------------------|-------------------|
| 01-M2-1                 | GAC-AAC        | 280                 | D-N                    | 94                       | G-A               |
| 12-M3-1                 | GAC-AAC        | 280                 | D-N                    | 94                       | G-A               |
| 14-M2-1                 | GAC-AAC        | 280                 | D-N                    | 94                       | G-A               |
| 14-M2-2                 | GAC-AAC        | 280                 | D-N                    | 94                       | G-A               |
| 14-M2-3                 | GAC-AAC        | 280                 | D-N                    | 94                       | G-A               |
| 18-M1-1                 | GAC-AAC        | 280                 | D-N                    | 94                       | G-A               |
| 18-M1-2                 | GAC-AAC        | 280                 | D-N                    | 94                       | G-A               |
| 19-M1-1                 | GAC-AAC        | 280                 | D-N                    | 94                       | G-A               |
| 19-M3-1                 | GAC-AAC        | 280                 | D-N                    | 94                       | G-A               |

<sup>a</sup>quinolone resistance determining region. <sup>b</sup>Clones were named in the order of the day of post-exposure to RIF, tube number (M1 to M5), and colony number. <sup>c</sup>Amino acid. M4 and M5 tubes did not have any mutant.

## Supplementary References

1. **Steenken W Jr.** 1935. Lysis of tubercle bacilli *in vitro*. Proc Soc Exptl Biol Med. **33**:253-255.
2. **Yanisch-Perron C, Vieira J, Messing J.** 1985. Improved M13 phage cloning vectors and host strains: nucleotide sequencing of the M13mp18 and pUC9 vectors. Gene **33**:103-119.
3. **Bhaskar A, Chawala M, Mehta M, Parikh P, Chandra P, Bhave D, Kumar D, Carroll KS, Singh A.** 2014. Reengineering redox sensitive GFP to measure mycothiol redox potential of *Mycobacterium tuberculosis* during infection. PLoS Pathog **10**:e1003902. doi:10.1371/journal.ppat.1003902.
4. **Roy S, Narayana Y, Balaji KN, Ajitkumar P.** 2012. Highly fluorescent GFP<sub>m</sub><sup>2+</sup>-based genome integration-proficient promoter probe vector to study *Mycobacterium tuberculosis* promoters in infected macrophages. Microb Biotechnol **5**:98-105.
5. **Altting-Mees MA, Short JM.** 1989. pBluescript II: gene mapping vectors. Nucleic Acids Res **17**:9494.
